# Supplementary material for: Soil–Plant Interaction Mediated by Indigenous AMF in Grafted and Own-Rooted Grapevines under Field Conditions
Source: MDPI journal article supplement (doi:10.3390/agriculture13051051), 2023-05-13
Supplement: s1 [file s1]

## Supplementary Materials

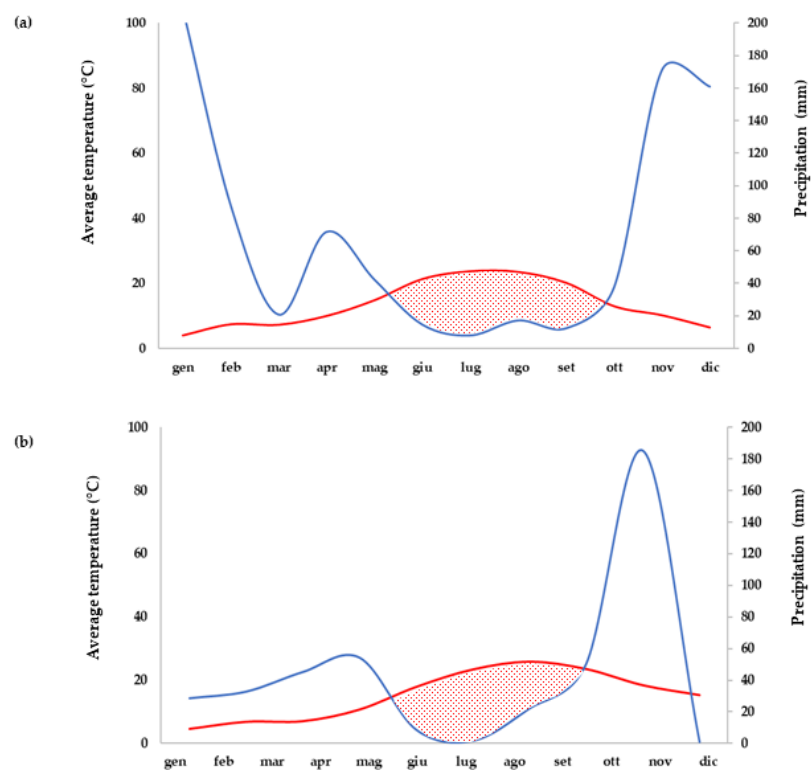

**Figure S1.** Climatic Bagnouls and Gaussen diagram and dry periods (red area) for the season 2021 (a) and 2022 (b) in tested grape-wine growing area (Central Italy – Gradoli municipality).
