# Supplementary material for: Soil–Plant Interaction Mediated by Indigenous AMF in Grafted and Own-Rooted Grapevines under Field Conditions
Source: MDPI journal article supplement (doi:10.3390/agriculture13051051), 2023-05-13
Supplement: s1 [file s1]

Archive with 1 entries (1 files):
- agriculture-2355884-supplementary.pdf
